# Supplementary material
Source: PubMed Central journal article supplement (PMC4449704)
Supplement: Supp_Fig1.pdf [file Supp_Fig1.pdf]

## Supplementary Data

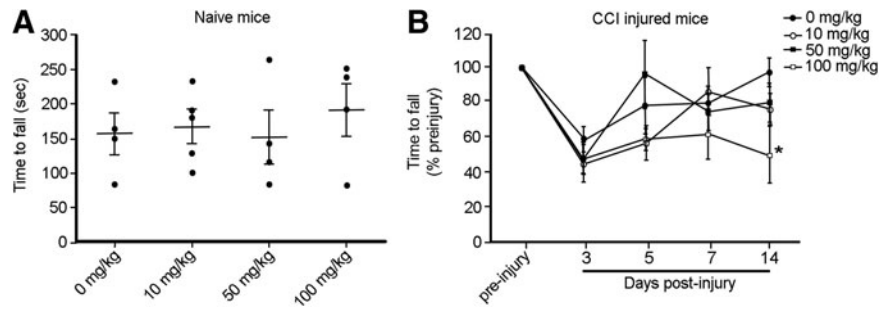

**SUPPLEMENTARY FIG. 1.** Standard dose of ganciclovir sodium (100 mg/kg) is deleterious to *nestin<sup>Δ</sup>-TK* mice ( $n=4$  per group). (A) Graph shows ganciclovir sodium treatment (0, 10, 50, or 100 mg/kg via osmotic minipump subcutaneously;  $n=4$ ,  $n=5$ ,  $n=4$ , and  $n=4$ , respectively) does not affect the ability of *nestin<sup>Δ</sup>-TK* mice to walk on the rotarod before injury; however, after controlled cortical impact (CCI) injury (B), *nestin<sup>Δ</sup>-TK* mice treated with 100 mg/kg ganciclovir sodium fall from the rotarod more quickly than mice given lower doses of ganciclovir sodium (0 – 50 mg/kg). \* $p < 0.05$ .
