# Supplementary material
Source: PubMed Central journal article supplement (PMC4449704)
Supplement: Supp_Fig2.pdf [file Supp_Fig2.pdf]

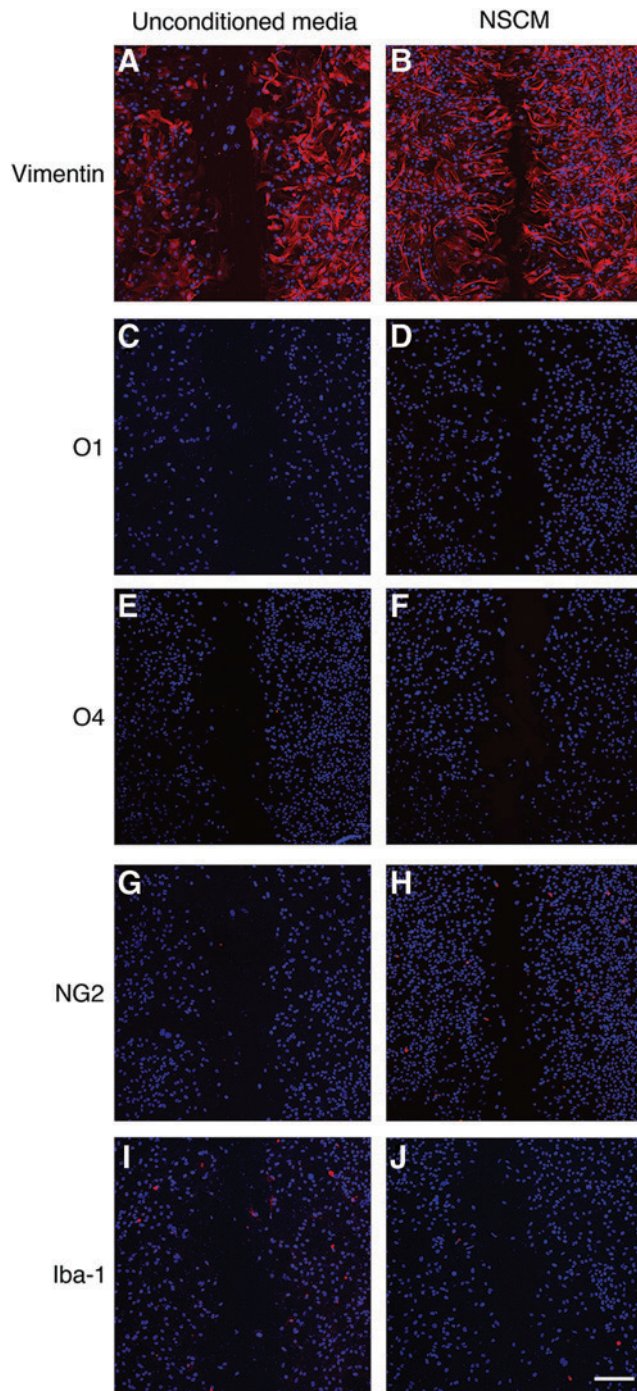

**SUPPLEMENTARY FIG. 2.** Astrocyte culture purity was assessed by labeling with antibodies to astrocytes, oligodendrocytes, glial precursors, and microglia/macrophages. At the scratch wound edge astrocytes, with or without the addition of conditioned neural stem/progenitor cell (NSPC) media (NSCM), showed expression of the astrocyte marker vimentin (**A, B**), while few cells expressed the oligodendrocyte markers O1 and O4 (**C–F**), the glial precursor marker NG2 (**G, H**), or the microglial/macrophage marker Iba-1 (**I, J**). Scale bar = 200  $\mu\text{m}$ .
