# Supplementary material
Source: PubMed Central journal article supplement (PMC4449704)
Supplement: Supp_Fig3.pdf [file Supp_Fig3.pdf]

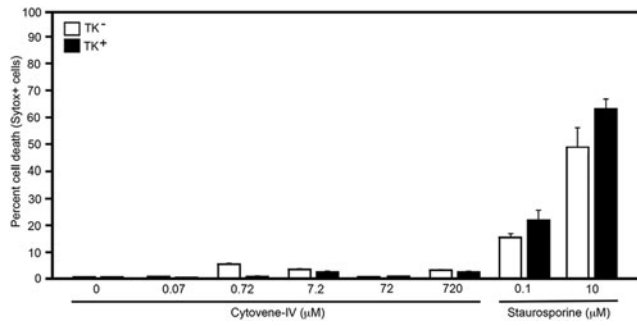

**SUPPLEMENTARY FIG. 3.** Gancyclovir sodium, 0–720  $\mu\text{M}$ , and staurosporine, 100 nM–10  $\mu\text{M}$ , were added to *nestin $^{\delta}$ -TK<sup>-</sup>* and *nestin $^{\delta}$ -TK<sup>+</sup>* astrocyte cultures, and cell death was measured using a Sytox red live/dead stain. The number of dead Sytox-positive cells was assessed as a percentage of the total hoescht-positive cells in each.
